# Supplementary material
Source: Research Square preprint supplement (doi:10.21203/rs.3.rs-9979779/v1)
Supplement: Supplementary file 1 [file 2ca1781c74eccc309070d06b.docx]

# Appendix 3. Comparison of Study Sample with the General Medical Council (GMC) Registry

**Table 1.** Gender

|  | **Sample**  (n = 984) | **GMC Registry**  (n = 72,106) | Chi-square Analysis |
| --- | --- | --- | --- |
|  |  |  | χ² (1) = 22.64, *p* < 0.001, Cramer’s V = 0.15 |
| **Female** | 497 (50%) | 41,867 (58%) |  |
| **Male** | 487 (49%) | 30,239 (42%) |  |

*Note: 19 (2%) participants responded ‘Prefer not to say’ and 1 (0%) participants responded ‘Other’ and their responses were excluded from the analysis. GMC Registry data included GPs with a licence who are current GPs, including trainees.*

*Source:* [*https://gde.gmc-uk.org/the-register/register-summary/register-data-summary*](https://gde.gmc-uk.org/the-register/register-summary/register-data-summary)

**Table 2.** Age range.

|  | **Sample**  (n = 1,004) | **GMC Registry**  (n = 72,106) |
| --- | --- | --- |
| **35 years or younger** | 99 (10%) | 7,190 (10%) |
| **36 – 45 years** | 342 (34%) | 27,164 (38%) |
| **46 – 55 years** | 394 (39%) | 21,810 (30%) |
| **56 years or older** | 169 (17%) | 15,942 (22%) |

*Note: Age ranges in the GMC Registry do not match the ones in the survey, so a statistical comparison was not carried out. GMC Registry ranges are 25-34, 35-44, 45-54, 55+.*

*Source:* [*https://gde.gmc-uk.org/the-register/register-summary/register-data-summary*](https://gde.gmc-uk.org/the-register/register-summary/register-data-summary)

**Table 3.** Location.

|  | **Sample**  (n = 1,004) | **GMC Registry**  (n = 71,725) | Chi-square Analysis |
| --- | --- | --- | --- |
|  |  |  | χ² (9) = 18.76, p < 0.05, Cramer’s V = 0.046 |
| **England** |  |  |  |
| North West | 123 (12%) | 7,671 (11%) |  |
| North East and Yorkshire | 135 (13%) | 8,666 (12%) |  |
| Midlands | 166 (17%) | 10,431 (15%) |  |
| East of England | 80 (8%) | 6,050 (8%) |  |
| London | 114 (11%) | 10,884 (15%) |  |
| South East | 125 (12%) | 9,423 (13%) |  |
| South West | 85 (8%) | 6,748 (9%) |  |
| **Northern Ireland** | 34 (3%) | 2,096 (3%) |  |
| **Scotland** | 98 (10%) | 6,672 (9%) |  |
| **Wales** | 44 (4%) | 3,084 (4%) |  |

*Note: The data includes all current GPs, including those who are specialists and trainees, but excludes those who selected their region as ‘other’.*

*Source:* [*https://gde.gmc-uk.org/the-register/register-by-uk-map/licensed-doctors-by-nhs-region*](https://gde.gmc-uk.org/the-register/register-by-uk-map/licensed-doctors-by-nhs-region)

**Table 4.** Comparison of sociodemographic characteristics of GenAI users and non-users GPs.

|  | **Users**  (n = 513 and n = 522) | **Non-users**  (n = 482) | Chi-square Analysis |
| --- | --- | --- | --- |
| **Gender*** |  |  | χ² (1) = 4.49, p <0.05, Cramer's V = 0.068 |
| Woman | 242 (49%) | 255 (51%) |  |
| Man | 271 (56%) | 216 (44%) |  |
| **Age** |  |  | χ² (3) = 26.61, p <0.001, Cramer's V = 0.163 |
| 35 years or under | 66 (67%) | 33 (33%) |  |
| 36 – 45 years | 186 (54%) | 156 (46%) |  |
| 46 – 55 years | 209 (53%) | 185 (47%) |  |
| 56 years or over | 61 (36%) | 108 (64%) |  |
| **Practice Size** |  |  | χ² (4) =24.45, p <0.001, Cramer's V = 0.156 |
| Up to 5,000 patients | 35 (32%) | 74 (68%) |  |
| 5,001-7,500 patients | 85 (55%) | 70 (45%) |  |
| 7,501-10,000 patients | 99 (49%) | 105 (51%) |  |
| 10,001-12,500 patients | 90 (53%) | 80 (47%) |  |
| 12,501 patients or more | 213 (58%) | 153 (42%) |  |

*Note*: All analyses are based on the whole sample (*n* = 1,004), except for *Gender* (*n* = 984), where responses *‘Prefer not to say’* (*n* = 20) were omitted.
