# Supplementary material
Source: Research Square preprint supplement (doi:10.21203/rs.3.rs-9979779/v1)
Supplement: Supplementary file 2 [file 2df7d21486b12e15bd60106c.docx]

# **Appendix 4**. Data tables including sub-group analyses

**Table 1.** Respondents’ purposeful use of GenAI tools in clinical practice, by gender, age group, role and practice size (% and number)

|  | **Total** | **Gender** | | **Age group** | | | | **Role** | | | **Practice size by patient number** | | | | |
| --- | --- | --- | --- | --- | --- | --- | --- | --- | --- | --- | --- | --- | --- | --- | --- |
|  | Total (n=1,004) | Male (n=487) | Female (n=497) | 35 or under (n=99) | 36 to 45 (n=342) | 46 to 55 (n=394) | 56 or over (n=169) | GP Partner/ Principal (n=438) | Salaried GP  (n=395) | Locum GP  (n=127) | Up to 5,000 (n=109) | 5,001-7,500 (n=155) | 7,501-10,000 (n=204) | 10,001-12,500 (n=170) | 12,501 or more (n=366) |
|  | A | B | C | D | E | F | G | H | I | J | K | L | M | N | O |
| Yes | 52%  (522) | 56%C  (271) | 49%  (242) | 67%E,F,G  (66) | 54%G  (186) | 53%G  (209) | 36%  (61) | 52%  (226) | 49%  (195) | 52%  (66) | 32%  (35) | 55%  (85) | 49%  (99) | 53%  (90) | 58%  (213) |
| No | 48%  (482) | 44%  (216) | 51%B  (255) | 33%  (33) | 46%D  (156) | 47%D  (185) | 64%D,E,F  (108) | 48%  (212) | 51%  (200) | 48%  (61) | 68%LMNO  (74) | 45%  (70) | 51%O  (105) | 47%  (80) | 42%  (153) |

*Note: Single response permitted. Mandatory question. Percentages may not sum to 100 due to rounding. Statistically significant differences are calculated at a 95% confidence level and indicated by column letters. For example, male GPs were significantly more likely to report use than female GPs (56% vs 49%). AI tool use varied markedly by age: GPs aged 35 or under were significantly more likely to report use than all three older age groups (67% vs 54%, 53%, and 36% respectively). GPs aged 56 or over were significantly less likely to report use than all younger age groups.*

**Table 2.** GenAI tools used, by respondents’ gender, age group, role and practice size (% and number)

|  | **Total** | **Gender** | | **Age group** | | | | **Role** | | | **Practice size by patient number** | | | | |
| --- | --- | --- | --- | --- | --- | --- | --- | --- | --- | --- | --- | --- | --- | --- | --- |
|  | Total (n=522) | Male (n=271) | Female (n=242) | 35 or under (n=66) | 36 to 45 (n=186) | 46 to 55 (n=209) | 56 or over (n=61) | GP Partner/ Principal (n=226) | Salaried GP  (n=195) | Locum GP  (n=66) | Up to 5,000 (n=35) | 5,001-7,500 (n=85) | 7,501-10,000 (n=99) | 10,001-12,500 (n=90) | 12,501 or more (n=213) |
|  | A | B | C | D | E | F | G | H | I | J | K | L | M | N | O |
| ChatGPT | 67%  (351) | 70%  (189) | 65%  (158) | 76%  (50) | 67%  (124) | 64%  (133) | 72%  (44) | 66%  (150) | 62%  (121) | 76%I  (50) | 69%  (24) | 75%O  (64) | 67%  (66) | 72%  (65) | 62%  (132) |
| Heidi Health | 46%  (242) | 47%  (128) | 45%  (110) | 42%  (28) | 51%G  (95) | 49%G  (102) | 28%  (17) | 50%J  (114) | 49%J  (95) | 35%  (23) | 29%  (10) | 44%  (37) | 46%  (46) | 50%K  (45) | 49%K  (104) |
| Microsoft Copilot | 24%  (124) | 32%C  (86) | 15%  (37) | 17%  (11) | 23%  (43) | 27%  (57) | 21%  (13) | 27%  (60) | 19%  (38) | 23%  (15) | 37%N  (13) | 28%  (24) | 24%  (24) | 19%  (17) | 22%  (46) |
| Gemini | 14%  (71) | 20%C  (55) | 6%  (15) | 11%  (7) | 16%  (29) | 13%  (28) | 11%  (7) | 12%  (26) | 14%  (27) | 15%  (10) | 20%  (7) | 13%  (11) | 12%  (12) | 11%  (10) | 15%  (31) |
| Claude | 3%  (18) | 7%C  (18) | 0%  (0) | 0%  (0) | 6%D  (11) | 2%D  (5) | 3%  (2) | 4%  (8) | 5%  (9) | 2%  (1) | 3%  (1) | 5%  (4) | 4%  (4) | 2%  (2) | 3%  (7) |
| Med-PaLM | 0%  (1) | 0%  (1) | 0%  (0) | 0%  (0) | 0%  (0) | 0%  (0) | 2%  (1) | 0%  (1) | 0%  (0) | 0%  (0) | 0%  (0) | 0%  (0) | 0%  (0) | 0%  (0) | 0%  (1) |
| Nuance Dragon Ambient eXperience (DAX) | 0%  (1) | 0%  (1) | 0%  (0) | 0%  (0) | 0%  (0) | 0%  (1) | 0%  (0) | 0%  (1) | 0%  (0) | 0%  (0) | 0%  (0) | 0%  (0) | 0%  (0) | 0%  (0) | 0%  (1) |
| Other (please specify) | 14%  (73) | 14%  (37) | 14%  (34) | 6%  (4) | 13%  (25) | 17%D  (36) | 13%  (8) | 15%  (35) | 15%  (29) | 11%  (7) | 14%  (5) | 9%  (8) | 13%  (13) | 12%  (11) | 17%  (36) |

*Note: Selection of multiple options permitted. No limit to number of options selected. Mandatory. Statistically significant differences are calculated at a 95% confidence level and indicated by column letters.*

**Table 3.** Purposes of use of GenAI tools, by respondents’ gender, age group, role and practice size (% and number)

|  | **Total** | **Gender** | | **Age group** | | | | **Role** | | | **Practice size by patient number** | | | | |
| --- | --- | --- | --- | --- | --- | --- | --- | --- | --- | --- | --- | --- | --- | --- | --- |
|  | Total (n=522) | Male (n=271) | Female (n=242) | 35 or under (n=66) | 36 to 45 (n=186) | 46 to 55 (n=209) | 56 or over (n=61) | GP Partner/ Principal (n=226) | Salaried GP  (n=195) | Locum GP  (n=66) | Up to 5,000 (n=35) | 5,001-7,500 (n=85) | 7,501-10,000 (n=99) | 10,001-12,500 (n=90) | 12,501 or more (n=213) |
|  | A | B | C | D | E | F | G | H | I | J | K | L | M | N | O |
| Writing letters | 51%  (268) | 49%  (132) | 55%  (134) | 47%  (31) | 55%G  (102) | 54%G  (113) | 36%  (22) | 56%J  (127) | 48%  (94) | 39%  (26) | 34%  (12) | 55%K  (47) | 46%  (46) | 62%K,M  (56) | 50%  (107) |
| Real-time documentation during patient consultations (e.g. ambient AI tools that listen to the consultation and generate notes automatically) | 41%  (212) | 44%  (118) | 38%  (92) | 33%  (22) | 43%G  (80) | 44%G  (92) | 30%  (18) | 49%I,J  (111) | 39%J  (76) | 26%  (17) | 26%  (9) | 33%  (28) | 40%  (40) | 40%  (36) | 46%K,L  (99) |
| Referrals | 31%  (161) | 32%  (87) | 30%  (73) | 26%  (17) | 38%F,G  (71) | 29%  (60) | 21%  (13) | 33%  (74) | 31%  (60) | 23%  (15) | 23%  (8) | 34%  (29) | 29%  (29) | 29%  (26) | 32%  (69) |
| Documentation after patient consultations (e.g. using generative AI tools to draft, summarise, or edit clinical notes following the encounter) | 30%  (159) | 31%  (85) | 30%  (72) | 35%  (23) | 32%G  (59) | 31%  (65) | 20%  (12) | 29%  (65) | 34%  (67) | 26%  (17) | 23%  (8) | 27%  (23) | 31%  (31) | 40%  (36) | 29%  (61) |
| Differential diagnosis | 28%  (145) | 32%C  (87) | 23%  (55) | 32%  (21) | 27%  (51) | 22%  (47) | 43%E,F  (26) | 21%  (47) | 27%  (53) | 47%H,I  (31) | 40%M  (14) | 29%  (25) | 18%  (18) | 32%M  (29) | 28%  (59) |
| Treatment options | 27%  (139) | 33%C  (89) | 19%  (47) | 35%F  (23) | 25%  (46) | 20%  (42) | 46%E,F  (28) | 21%  (47) | 28%  (55) | 36%H  (24) | 40%  (14) | 26%  (22) | 25%  (25) | 28%  (25) | 25%  (53) |
| Patient summarization/timelines from prior documentation | 12%  (65) | 17%C  (47) | 7%  (17) | 14%  (9) | 13%  (25) | 12%  (25) | 10%  (6) | 13%  (29) | 12%  (24) | 9%  (6) | 9%  (3) | 14%  (12) | 12%  (12) | 13%  (12) | 12%  (26) |
| Medical certification e.g., for employment | 3%  (18) | 4%  (10) | 3%  (8) | 5%  (3) | 3%  (6) | 4%  (8) | 2%  (1) | 3%  (7) | 4%  (8) | 3%  (2) | 0%  (0) | 2%  (2) | 5%K  (5) | 2%  (2) | 4%K  (9) |
| Other (please specify) | 10%  (50) | 8%  (21) | 11%  (27) | 3%  (2) | 8%  (14) | 13%D  (27) | 11%  (7) | 11%  (24) | 11%  (21) | 8%  (5) | 9%  (3) | 14%  (12) | 11%  (11) | 8%  (7) | 8%  (17) |

*Note: Selection of multiple options permitted. No limit to number of options selected. Mandatory. Statistically significant differences are calculated at a 95% confidence level and indicated by column letters.*

**Table 4**. Perceptions of current reduced work burdens due to GenAI, by respondents’ gender, age group, role and practice size (% and number)

|  | **Total** | **Gender** | | **Age group** | | | | **Role** | | | **Practice size by patient number** | | | | |
| --- | --- | --- | --- | --- | --- | --- | --- | --- | --- | --- | --- | --- | --- | --- | --- |
|  | Total (n=522) | Male (n=271) | Female (n=242) | 35 or under (n=66) | 36 to 45 (n=186) | 46 to 55 (n=209) | 56 or over (n=61) | GP Partner/ Principal (n=226) | Salaried GP  (n=195) | Locum GP  (n=66) | Up to 5,000 (n=35) | 5,001-7,500 (n=85) | 7,501-10,000 (n=99) | 10,001-12,500 (n=90) | 12,501 or more (n=213) |
|  | A | B | C | D | E | F | G | H | I | J | K | L | M | N | O |
| Yes | 70%  (363) | 71%  (192) | 68%  (165) | 83%E,F,G  (55) | 70%G  (131) | 70%G  (147) | 49%  (30) | 72%  (162) | 67%  (130) | 61%  (40) | 63%  (22) | 78%O  (66) | 70%  (69) | 71%  (64) | 67%  (142) |
| No | 30%  (159) | 29%  (79) | 32%  (77) | 17%  (11) | 30%D  (55) | 30%D  (62) | 51%D,E,F  (31) | 28%  (64) | 33%  (65) | 39%  (26) | 37%  (13) | 22%  (19) | 30%  (30) | 29%  (26) | 33%L  (71) |

*Note: Single response permitted. Mandatory question. Percentages may not sum to 100 due to rounding. Statistically significant differences are calculated at a 95% confidence level and indicated by column letters.*

**Table 5.** Respondents’ perceptions of the relationship between GPs and AI in healthcare in the next five years, by gender, age group, role and practice size (% and number)

|  | **Total** | **Gender** | | **Age group** | | | | **Role** | | | **Practice size by patient number** | | | | |
| --- | --- | --- | --- | --- | --- | --- | --- | --- | --- | --- | --- | --- | --- | --- | --- |
|  | Total (n=1,004) | Male (n=487) | Female (n=497) | 35 or under (n=99) | 36 to 45 (n=342) | 46 to 55 (n=394) | 56 or over (n=169) | GP Partner/ Principal (n=438) | Salaried GP  (n=395) | Locum GP  (n=127) | Up to 5,000 (n=109) | 5,001-7,500 (n=155) | 7,501-10,000 (n=204) | 10,001-12,500 (n=170) | 12,501 or more (n=366) |
|  | A | B | C | D | E | F | G | H | I | J | K | L | M | N | O |
| A simple tool (like a stethoscope) | 21%  (209) | 23%C  (114) | 18%  (91) | 35%E,F,G  (35) | 23%G  (79) | 18%  (71) | 14%  (24) | 26%I,J  (112) | 17%  (66) | 13%  (17) | 20%  (22) | 17%  (27) | 18%  (36) | 26%  (44) | 22%  (80) |
| A helpful collaborator (AI + GP working as a team) | 46%  (462) | 47%  (229) | 46%  (227) | 44%  (44) | 46%  (159) | 47%  (187) | 43%  (72) | 46%  (201) | 47%  (184) | 42%  (53) | 36%  (39) | 50%K  (78) | 45%  (92) | 44%  (74) | 49%K  (179) |
| A potential competitor that could replace GP tasks | 10%  (103) | 10%  (50) | 10%  (52) | 9%  (9) | 10%  (34) | 12%  (46) | 8%  (14) | 9%  (40) | 11%  (42) | 14%  (18) | 12%  (13) | 9%  (14) | 11%  (22) | 9%  (16) | 10%  (38) |
| Unsure | 23%  (230) | 19%  (94) | 26%B  (127) | 11%  (11) | 20%D  (70) | 23%D  (90) | 35%D,E,F  (59) | 19%  (85) | 26%H  (103) | 31%H  (39) | 32%N,O  (35) | 23%  (36) | 26%O  (54) | 21%  (36) | 19%  (69) |

*Note: Single response permitted. Mandatory question. Percentages may not sum to 100 due to rounding. Statistically significant differences are calculated at a 95% confidence level and indicated by column letters.*

**Table 6.** Role AI was expected to play in respondents’ routine clinical practice in next five years, by gender, age group, role and practice size (% and number)

|  | **Total** | **Gender** | | **Age group** | | | | **Role** | | | **Practice size by patient number** | | | | |
| --- | --- | --- | --- | --- | --- | --- | --- | --- | --- | --- | --- | --- | --- | --- | --- |
|  | Total (n=1,004) | Male (n=487) | Female (n=497) | 35 or under (n=99) | 36 to 45 (n=342) | 46 to 55 (n=394) | 56 or over (n=169) | GP Partner/ Principal (n=438) | Salaried GP  (n=395) | Locum GP  (n=127) | Up to 5,000 (n=109) | 5,001-7,500 (n=155) | 7,501-10,000 (n=204) | 10,001-12,500 (n=170) | 12,501 or more (n=366) |
|  | A | B | C | D | E | F | G | H | I | J | K | L | M | N | O |
| Not at all | 1%  (14) | 1%  (6) | 1%  (6) | 0%  (0) | 1%  (3) | 1%D  (5) | 4%D  (6) | 1%  (5) | 2%  (8) | 1%  (1) | 2%  (2) | 2%  (3) | 2%  (4) | 1%  (1) | 1%  (4) |
| Minor role | 22%  (225) | 22%  (106) | 24%  (117) | 19%  (19) | 24%  (82) | 23%  (92) | 19%  (32) | 26%  (112) | 22%  (85) | 21%  (27) | 28%  (31) | 21%  (33) | 22%  (44) | 24%  (40) | 21%  (77) |
| Moderate role | 37%  (372) | 37%  (179) | 38%  (189) | 41%  (41) | 35%  (120) | 38%  (148) | 37%  (63) | 39%J  (171) | 37%  (148) | 29%  (37) | 32%  (35) | 32%  (50) | 39%  (80) | 41%  (69) | 38%  (138) |
| Major role | 20%  (204) | 22%  (106) | 19%  (92) | 24%  (24) | 21%  (73) | 20%  (80) | 16%  (27) | 21%  (90) | 18%  (70) | 21%  (27) | 17%  (18) | 23%  (35) | 19%  (39) | 21%  (36) | 21%  (76) |
| Transformative | 12%  (117) | 13%  (61) | 11%  (54) | 11%  (11) | 13%  (43) | 11%  (42) | 12%  (21) | 9%  (40) | 12%  (46) | 17%H  (22) | 10%  (11) | 12%  (18) | 10%  (21) | 10%  (17) | 14%  (50) |
| Unsure | 7%  (72) | 6%  (29) | 8%  (39) | 4%  (4) | 6%  (21) | 7%  (27) | 12%D,E  (20) | 5%  (20) | 10%H  (38) | 10%H  (13) | 11%N  (12) | 10%N  (16) | 8%  (16) | 4%  (7) | 6%  (21) |

*Note: Single response permitted. Mandatory question. Percentages may not sum to 100 due to rounding. Statistically significant differences are calculated at a 95% confidence level and indicated by column letters.*

**Table 7.** Respondents’ views on whether AI will reduce reliance on certain traditional GP skills in the next 10 years, by gender, age group, role and practice size (% and number)

|  | **Total** | **Gender** | | **Age group** | | | | **Role** | | | **Practice size by patient number** | | | | |
| --- | --- | --- | --- | --- | --- | --- | --- | --- | --- | --- | --- | --- | --- | --- | --- |
|  | Total (n=1,004) | Male (n=487) | Female (n=497) | 35 or under (n=99) | 36 to 45 (n=342) | 46 to 55 (n=394) | 56 or over (n=169) | GP Partner/ Principal (n=438) | Salaried GP  (n=395) | Locum GP  (n=127) | Up to 5,000 (n=109) | 5,001-7,500 (n=155) | 7,501-10,000 (n=204) | 10,001-12,500 (n=170) | 12,501 or more (n=366) |
|  | A | B | C | D | E | F | G | H | I | J | K | L | M | N | O |
| Yes - AI will replace some core skills | 16%  (163) | 19%  (91) | 14%  (71) | 12%  (12) | 16%  (56) | 18%  (69) | 15%  (26) | 16%  (68) | 16%  (63) | 20%  (26) | 19%  (21) | 15%  (23) | 20%  (40) | 15%  (25) | 15%  (54) |
| Partly - AI will change which skills matter most | 34%  (337) | 34%  (165) | 33%  (165) | 35%  (35) | 32%  (111) | 34%  (134) | 34%  (57) | 35%  (152) | 31%  (123) | 36%  (46) | 24%  (26) | 35%K  (55) | 29%  (59) | 40%K,M  (68) | 35%K  (129) |
| No - core  GP skills will remain largely unchanged | 41%  (415 | 40%  (193) | 43%  (216) | 47%G  (47) | 44%G  (152) | 41%G  (162) | 32%  (54) | 43%J  (188) | 42%J  (166) | 31%  (40) | 45%  (49) | 40%  (62) | 39%  (80) | 41%  (70) | 42%  (154) |
| Unsure | 9%  (89) | 8%  (38) | 9%  (45) | 5%  (5) | 7%  (23) | 7%  (29) | 19%D,E,F  (32) | 7%  (30) | 11%H  (43) | 12%  (15) | 12%N  (13) | 10%N  (15) | 12%N  (25) | 4%  (7) | 8%  (29) |

*Note: Single response permitted. Mandatory question. Percentages may not sum to 100 due to rounding. Statistically significant differences are calculated at a 95% confidence level and indicated by column letters.*

**Table 8.** Respondents’ views on which GP skills or tasks could be most affected by AI in the next 10 years, by gender, age group, role and practice size (% and number)

|  | **Total** | **Gender** | | **Age group** | | | | **Role** | | | **Practice size by patient number** | | | | |
| --- | --- | --- | --- | --- | --- | --- | --- | --- | --- | --- | --- | --- | --- | --- | --- |
|  | Total (n=915) | Male (n=449) | Female (n=452) | 35 or under (n=94) | 36 to 45 (n=319) | 46 to 55 (n=365) | 56 or over (n=137) | GP Partner/ Principal (n=408) | Salaried GP  (n=352) | Locum GP  (n=112) | Up to 5,000 (n=96) | 5,001-7,500 (n=140) | 7,501-10,000 (n=179) | 10,001-12,500 (n=163) | 12,501 or more (n=337) |
|  | A | B | C | D | E | F | G | H | I | J | K | L | M | N | O |
| Documentation | 89%  (811) | 88%  (394) | 89%  (403) | 96%E,F,G  (90) | 88%  (280) | 89%  (324) | 85%  (117) | 88%  (360) | 89%  (312) | 88%  (98) | 84%  (81) | 86%  (120) | 89%  (159) | 93%K,L  (152) | 89%  (299) |
| Medical knowledge recall | 56%  (509) | 59%  (264) | 53%  (240) | 56%  (53) | 52%  (165) | 55%  (202) | 65%E,F  (89) | 53%  (217) | 57%  (200) | 58%  (65) | 55%  (53) | 59%M  (83) | 48%  (86) | 56%  (92) | 58%M  (195) |
| Diagnostic problem-solving | 48%  (442) | 55%C  (246) | 42%  (190) | 35%  (33) | 44%  (141) | 50%D  (182) | 63%D,E,F  (86) | 48%  (194) | 48%  (170) | 56%  (63) | 51%  (49) | 44%  (61) | 49%  (87) | 45%  (74) | 51%  (171) |
| Referral decision-making | 42%  (383) | 48%C  (216) | 35%  (160) | 29%  (27) | 38%  (122) | 44%D  (159) | 55%D,E,F  (75) | 42%  (171) | 41%  (146) | 49%  (55) | 48%  (46) | 36%  (50) | 41%  (73) | 37%  (61) | 45%L  (153) |
| Patient communication | 35%  (319) | 35%  (158) | 35%  (157) | 33%  (31) | 35%  (111) | 31%  (114) | 46%D,E,F  (63) | 34%  (139) | 34%  (120) | 42%  (47) | 28%  (27) | 37%  (52) | 35%  (63) | 37%  (60) | 35%  (117) |
| Care coordination | 32%  (291) | 34%  (152) | 30%  (137) | 31%  (29) | 26%  (83) | 34%E  (125) | 39%E  (54) | 32%  (130) | 29%  (103) | 38%  (43) | 31%  (30) | 29%  (41) | 35%  (63) | 31%  (51) | 31%  (106) |
| Empathy | 6%  (53) | 5%  (22) | 7%  (30) | 4%  (4) | 5%  (16) | 7%  (24) | 7%  (9) | 5%  (21) | 6%  (21) | 7%  (8) | 5%  (5) | 8%  (11) | 7%  (13) | 5%  (8) | 5%  (16) |
| Physical examination | 4%  (37) | 4%  (20) | 4%  (17) | 2%  (2) | 3%  (11) | 5%  (18) | 4%  (6) | 4%  (16) | 3%  (12) | 7%  (8) | 4%  (4) | 6%  (8) | 4%  (8) | 4%  (7) | 3%  (10) |
| Other (please specify) | 2%  (19) | 2%  (9) | 2%  (7) | 0%  (0) | 2%D  (7) | 2%D  (8) | 3%D  (4) | 2%  (8) | 3%  (9) | 2%  (2) | 2%  (2) | 2%  (3) | 1%  (2) | 2%  (4) | 2%  (8) |

*Note: Selection of multiple options permitted. No limit to number of options selected. Mandatory question. Statistically significant differences are calculated at a 95% confidence level and indicated by column letters.*

**Table 9.** Expectations for AI-based tools on the meaningfulness of GP work in the next 10 years, by gender, age group, role and practice size (% and number)

|  | **Total** | **Gender** | | **Age group** | | | | **Role** | | | **Practice size by patient number** | | | | |
| --- | --- | --- | --- | --- | --- | --- | --- | --- | --- | --- | --- | --- | --- | --- | --- |
|  | Total (n=1,004) | Male (n=487) | Female (n=497) | 35 or under (n=99) | 36 to 45 (n=342) | 46 to 55 (n=394) | 56 or over (n=169) | GP Partner/ Principal (n=438) | Salaried GP  (n=395) | Locum GP  (n=127) | Up to 5,000 (n=109) | 5,001-7,500 (n=155) | 7,501-10,000 (n=204) | 10,001-12,500 (n=170) | 12,501 or more (n=366) |
|  | A | B | C | D | E | F | G | H | I | J | K | L | M | N | O |
| Make GP work less meaningful | 19%  (194) | 20%  (98) | 18%  (91) | 12%  (12) | 19%  (65) | 20%D  (79) | 22%G  (38) | 18%  (79) | 20%  (78) | 28%H  (35) | 24%  (26) | 19%  (30) | 18%  (36) | 17%  (29) | 20%  (73) |
| Make GP work more meaningful | 22%  (225) | 28%C  (134) | 18%  (89) | 25%  (25) | 25%  (84) | 21%  (81) | 21%  (35) | 23%  (102) | 21%  (81) | 17%  (22) | 18%  (20) | 20%  (31) | 24%  (49) | 21%  (36) | 24%  (89) |
| Have no impact on the meaningfulness of GP work | 37%  (367) | 34%  (165) | 39%  (196) | 42%G  (42) | 37%  (128) | 38%G  (148) | 29%  (49) | 40%J  (174) | 37%J  (148) | 25%  (32) | 36%  (39) | 37%  (58) | 36%  (73) | 36%  (61) | 37%  (136) |
| Unsure | 22%  (218) | 18%  (90) | 24%B  (121) | 20%  (20) | 19%  (65) | 22%  (86) | 28%E  (47) | 19%  (83) | 22%  (88) | 30%H  (38) | 22%  (24) | 23%  (36) | 23%  (46) | 26%  (44) | 19%  (68) |

*Note: Single response permitted. Mandatory question. Percentages may not sum to 100 due to rounding. Statistically significant differences are calculated at a 95% confidence level and indicated by column letters.*

**Table 10.** GPs’ views on how patients would respond if AI systems took over some routine GP tasks in the next 10 years, by gender, age group, role and practice size (% and number)

|  | **Total** | **Gender** | | **Age group** | | | | **Role** | | | **Practice size by patient number** | | | | |
| --- | --- | --- | --- | --- | --- | --- | --- | --- | --- | --- | --- | --- | --- | --- | --- |
|  | Total (n=1,004) | Male (n=487) | Female (n=497) | 35 or under (n=99) | 36 to 45 (n=342) | 46 to 55 (n=394) | 56 or over (n=169) | GP Partner/ Principal (n=438) | Salaried GP  (n=395) | Locum GP  (n=127) | Up to 5,000 (n=109) | 5,001-7,500 (n=155) | 7,501-10,000 (n=204) | 10,001-12,500 (n=170) | 12,501 or more (n=366) |
|  | A | B | C | D | E | F | G | H | I | J | K | L | M | N | O |
| Very positively | 2%  (19) | 2%  (10) | 2%  (8) | 4%  (4) | 3%  (9) | 1%  (5) | 1%  (1) | 2%  (7) | 2%  (7) | 4%  (5) | 1%  (1) | 0%  (0) | 2%L  (5) | 4%L  (6) | 2%L  (7) |
| Mostly positively | 15%  (154) | 20%C  (97) | 11%  (57) | 18%  (18) | 15%  (50) | 15%  (59) | 16%  (27) | 17%J  (76) | 14%  (57) | 10%  (13) | 13%  (14) | 20%M  (31) | 11%  (22) | 17%  (29) | 16%  (58) |
| Mixed / divided | 53%  (537) | 51%  (249) | 57%  (283) | 51%  (50) | 52%  (178) | 56%  (219) | 53%  (90) | 52%  (228) | 53%  (211) | 54%  (69) | 44%  (48) | 52%  (80) | 58%K  (118) | 54%  (91) | 55%  (200) |
| Mostly negatively | 17%  (171) | 16%  (79) | 17%  (86) | 19%  (19) | 19%  (65) | 16%  (63) | 14%  (24) | 17%  (76) | 19%  (74) | 14%  (18) | 21%L  (23) | 12%  (18) | 19%L  (39) | 17%  (29) | 17%  (62) |
| Very negatively | 5%  (51) | 5%  (22) | 5%  (27) | 4%  (4) | 7%F  (23) | 3%  (13) | 7%  (11) | 5%  (23) | 4%  (15) | 9%  (11) | 9%N  (10) | 5%  (8) | 4%  (8) | 3%  (5) | 5%  (20) |
| Unsure | 7%  (72) | 6%  (30) | 7%  (36) | 4%  (4) | 5%  (17) | 9%D,E  (35) | 9%  (16) | 6%  (28) | 8%  (31) | 9%  (11) | 12%O  (13) | 12%O  (18) | 6%  (12) | 6%  (10) | 5%  (19) |

*Note: Single response permitted. Mandatory question. Percentages may not sum to 100 due to rounding. Statistically significant differences are calculated at a 95% confidence level and indicated by column letters.*

**Table 11.** GPs’ views on how – if at all – developments in AI tools would affect advice given to someone considering a career as a GP, by gender, age group, role and practice size (% and number)

|  | **Total** | **Gender** | | **Age group** | | | | **Role** | | | **Practice size by patient number** | | | | |
| --- | --- | --- | --- | --- | --- | --- | --- | --- | --- | --- | --- | --- | --- | --- | --- |
|  | Total (n=1,004) | Male (n=487) | Female (n=497) | 35 or under (n=99) | 36 to 45 (n=342) | 46 to 55 (n=394) | 56 or over (n=169) | GP Partner/ Principal (n=438) | Salaried GP  (n=395) | Locum GP  (n=127) | Up to 5,000 (n=109) | 5,001-7,500 (n=155) | 7,501-10,000 (n=204) | 10,001-12,500 (n=170) | 12,501 or more (n=366) |
|  | A | B | C | D | E | F | G | H | I | J | K | L | M | N | O |
| I would encourage them just as strongly as before | 23%  (226) | 26%C  (126) | 20%  (99) | 23%  (23) | 24%  (81) | 20%  (79) | 25%  (43) | 28%I,J  (121) | 19%  (75) | 13%  (17) | 20%  (22) | 16%  (25) | 21%  (43) | 23%  (39) | 27%L  (97) |
| I would encourage them, but with reservations | 25%  (252) | 28%  (134) | 23%  (116) | 29%  (29) | 22%  (75) | 24%  (95) | 31%E  (53) | 25%  (111) | 24%  (93) | 28%  (35) | 23%  (25) | 27%  (42) | 25%  (52) | 28%  (48) | 23%  (85) |
| I would be more hesitant than before | 14%  (137) | 13%  (62) | 14%  (71) | 9%  (9) | 14%  (49) | 15%  (61) | 11%  (18) | 13%  (57) | 14%  (56) | 17%  (22) | 17%  (18) | 17%  (26) | 12%  (25) | 14%  (24) | 12%  (44) |
| I would discourage them | 7%  (72) | 8%  (40) | 6%  (29) | 2%  (2) | 7%D  (24) | 8% D  (32) | 8% D  (14) | 6%  (27) | 8%  (32) | 9%  (12) | 5%  (5) | 8%  (13) | 8%  (17) | 5%  (9) | 8%  (28) |
| I don’t yet feel able to advise either way | 32%  (317) | 26%  (125) | 37%B  (182) | 36%G  (36) | 33%G  (113) | 32%G  (127) | 24%  (41) | 28%  (122) | 35%H  (139) | 32%  (41) | 36%  (39) | 32%  (49) | 33%  (67) | 29%  (50) | 31%  (112) |

*Note: Single response permitted. Mandatory question. Percentages may not sum to 100 due to rounding. Statistically significant differences are calculated at a 95% confidence level and indicated by column letters.*

**Table 12.** Expectations on how respondents believe the GP profession will change in the next 20 years, by gender, age group, role and practice size (% and number)

|  | **Total** | **Gender** | | **Age group** | | | | **Role** | | | **Practice size by patient number** | | | | |
| --- | --- | --- | --- | --- | --- | --- | --- | --- | --- | --- | --- | --- | --- | --- | --- |
|  | Total (n=1,004) | Male (n=487) | Female (n=497) | 35 or under (n=99) | 36 to 45 (n=342) | 46 to 55 (n=394) | 56 or over (n=169) | GP Partner/ Principal (n=438) | Salaried GP  (n=395) | Locum GP  (n=127) | Up to 5,000 (n=109) | 5,001-7,500 (n=155) | 7,501-10,000 (n=204) | 10,001-12,500 (n=170) | 12,501 or more (n=366) |
|  | A | B | C | D | E | F | G | H | I | J | K | L | M | N | O |
| The GP role will remain largely unchanged | 12%  (124) | 13%  (64) | 12%  (58) | 14%  (14) | 14%G  (48) | 12%  (49) | 8%  (13) | 13%  (59) | 12%  (47) | 9%  (12) | 15%  (16) | 17%O  (27) | 10%  (21) | 12%  (21) | 11%  (39) |
| AI will significantly reshape the GP role, but GPs will remain central to care | 59%  (590) | 59%  (287) | 59%  (295) | 69%F  (68) | 59%  (203) | 56%  (219) | 59%  (100) | 62%J  (272) | 56%  (221) | 51%  (65) | 53%  (58) | 52%  (80) | 60%  (123) | 61%  (104) | 61%L  (225) |
| AI will take over most GP tasks, with doctors mainly providing oversight | 11%  (115) | 13%  (63) | 10%  (51) | 9%  (9) | 11%  (36) | 13%  (50) | 12%  (20) | 10%  (45) | 12%  (48) | 14%  (18) | 15%  (16) | 11%  (17) | 10%  (21) | 11%  (18) | 12%  (43) |
| AI will largely replace GPs, with minimal doctor involvement | 3%  (31) | 3%  (14) | 3%  (17) | 0%  (0) | 2%D  (8) | 4% D  (15) | 5% D  (8) | 2%  (8) | 3%  (11) | 9%H,I  (12) | 2%  (2) | 5%  (7) | 3%  (7) | 3%  (5) | 3%  (10) |
| Unsure | 14%  (144) | 12%  (59) | 15%  (76) | 8%  (8) | 14%  (47) | 15% D  (61) | 17% D  (28) | 12%  (54) | 17%H  (68) | 16%  (20) | 16%  (17) | 15%  (24) | 16%  (32) | 13%  (22) | 13%  (49) |

*Note: Single response permitted. Mandatory question. Percentages may not sum to 100 due to rounding. Statistically significant differences are calculated at a 95% confidence level and indicated by column letters.*
