# Supplementary material
Source: Research Square preprint supplement (doi:10.21203/rs.3.rs-9979779/v1)
Supplement: Supplementary file 4 [file ce62af27bbe9dd4d804f1893.docx]

# Appendix 1. Checklist for Reporting Results of Internet E-Surveys (CHERRIES)

| **Item Category** | **Checklist item** | **Described in the manuscript** | **Cited from the manuscript** |
| --- | --- | --- | --- |
| **Design** | Describe survey design | Yes | In **Methods > Survey Design** |
| **IRB (Institutional Review Board) approval and informed consent process** | IRB approval | Yes | **Methods > Ethical considerations**  Ethical approval was granted by the Faculty of Psychology, University of Basel (approval number 032-25-1). |
| Informed consent | Yes | **Methods** > **Ethical considerations**  Participation is voluntary and respondents provided informed consent before taking part. |
| Data protection | Yes | **Methods** > **Ethical considerations**  The survey was administered through Doctors.net.uk, a secure platform that uses encryption and anonymisation to prevent linkage between responses and personal identifiers. All identifiable information, including email addresses, was removed prior to transfer of the dataset to the research team. Doctors.net.uk complies with General Data Protection Regulation. |
| **Development and pre-testing** | Development and testing | Yes | **Methods > Survey Design** The final questionnaire was pre-tested with five UK GPs, with no modifications made, and designed to be completed within approximately five minutes. |
| **Recruitment process and description of the sample having access to the questionnaire** | Open survey versus closed survey | Yes | **Methods > Survey Administration**  As in 2024 and 2025 [5,6,11,23], the study was administered as part of Doctors.net.uk’s monthly omnibus surveys, which aim to secure around 1000 completed questionnaires from among its 272,700 General Medical Council (GMC) registered members [22]. |
| Contact mode | Yes | **Methods > Survey Administration**  Survey invitations were delivered by email or presented as homepage notifications on Doctors.net.uk according to users’ communication preferences. |
| Advertising the survey | Yes | **Methods > Survey Administration**  Survey invitations were delivered by email or presented as homepage notifications on Doctors.net.uk according to users’ communication preferences. |
| **Survey administration** | Web/E-mail | Yes | **Methods > Survey Administration**  Survey invitations were delivered by email or presented as homepage notifications on Doctors.net.uk according to users’ communication preferences. |
| Context | Yes | **Methods > Survey Administration**  As in 2024 and 2025 [5,6,11,23], the study was administered as part of Doctors.net.uk’s monthly omnibus surveys, which aim to secure around 1000 completed questionnaires from among its 272,700 General Medical Council (GMC) registered members [22]. |
| Mandatory/voluntary | Yes | **Methods > Ethical considerations** Participation is voluntary and respondents provided informed consent before taking part. |
| Incentives | Yes | **Methods > Survey Administration** Participants received a shopping voucher worth £7.50 (US$8.80; €8.83) upon completion. |
| Time/Date | Yes | **Methods > Survey Administration** Data collection took place from 7 January to 26 January 2026 and closed once 1000 complete GP responses were verified from the 25,500 GPs active on the platform during fieldwork. |
| Randomization of items or questionnaires | No | **--** |
| Adaptive questioning | No | **--** |
| Number of Items | No | **--** |
| Number of screens (pages) | No | **--** |
| Completeness check | Yes | **Methods > Survey Administration** In omnibus surveys, respondents are required to answer all closed-ended items to be included in the final sample. |
| Review step | No | **--** |
| **Response rates** | Unique site visitor | Yes | **Results > Respondent Characteristics** During the promotion period 9,392 GPs registered on Doctors.net.uk logged in (defined as unique site visitors) and consequently were exposed to the invitation, while 2,929 GPs were contacted directly by email. |
| View rate (Ratio of unique survey visitors/unique site visitors) | Yes | **Results > Respondent Characteristics** In accordance with CHERRIES the survey view rate was 11.88% (1,116 /9,392 = unique survey visitors / unique site visitors). |
| Participation rate (Ratio of unique visitors who agreed to participate/unique first survey page visitors) | Yes | **Results > Respondent Characteristics** The participation rate was 94.26% (1,052 /1,116 = unique visitors who agreed to participate / unique first survey page visitors). |
| Completion rate (Ratio of users who finished the survey/users who agreed to participate) | Yes | **Results > Respondent Characteristics** A total of 1004 GPs completed the survey, resulting in a completion rate of 95.43% (1,004 /1,052 = users who finished the survey / users who agreed to participate). |
| **Preventing multiple entries from the same individual** | Cookies used | No | Not used as a means to prevent multiple entries. |
| IP check | No | Not used as a means to prevent multiple entries. |
| Log file analysis | No | Not used as a means to prevent multiple entries. |
| Registration | No | **Methods > Survey Administration** Registration prevents multiple entries and ensures that potential respondents meeting the survey requirements have access. |
| **Analysis** | Handling of incomplete questionnaires | Yes | **Methods > Survey Administration**  As in 2024 and 2025 [5,6,11,23], the study was administered as part of Doctors.net.uk’s monthly omnibus surveys, which aim to secure around 1000 completed questionnaires from among its 272,700 General Medical Council (GMC) registered members [22]. […] In omnibus surveys, respondents are required to answer all closed-ended items to be included in the final sample. |
| Questionnaires submitted with an atypical timestamp | No | **--** |
| Statistical correction | No | **--** |

Reference:

Eysenbach G. Improving the quality of Web surveys: the Checklist for Reporting Results of Internet E-Surveys (CHERRIES). J Med Internet Res 2004;6:e34.
